# Supplementary material for: Cisplatin encapsulated nanoparticles from polymer blends for anti-cancer drug delivery
Source: Royal Society of Chemistry journal article supplement (doi:10.1039/d1nj04311k), 2022-01-01
Supplement: d1nj04311k1.pdf [file d1nj04311k1.pdf]

## Supplementary Information

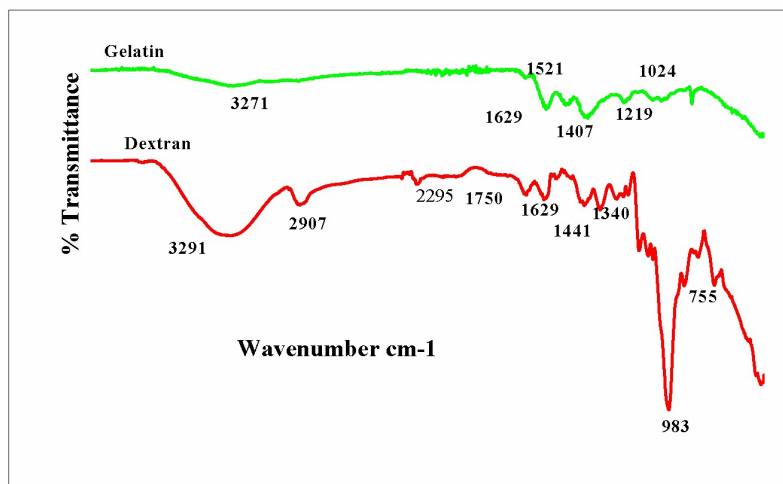

Supplementary figure S1: FT-IR spectrum of Gelatin and Dextran

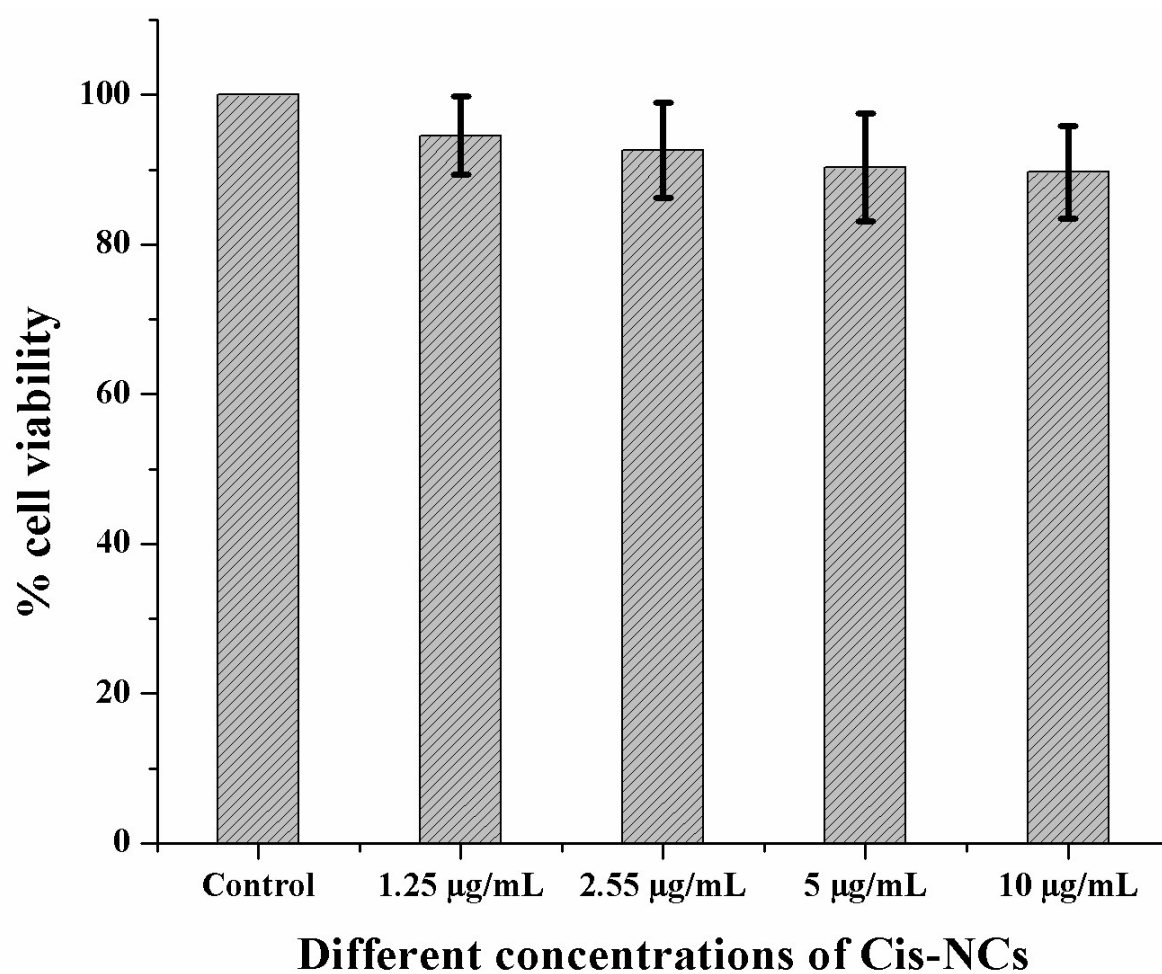

**Supplementary figure S2 Cell viability determination by MTT assay in the presence of nanoparticles, cell viability (%) of human fibroblast cells when exposed to Cis-NCs of different concentrations**
